# Supplementary material for: Distribution of rhizosphere fungi of Kobresia humilis on the Qinghai-Tibet Plateau
Source: PeerJ. 2024 Feb 20;12:e16620. doi: 10.7717/peerj.16620 (PMC10885805; doi:10.7717/peerj.16620)
Supplement: Supplemental Information 1 [file peerj-12-16620-s001.xlsx]

## Sheet: Sheet1
Table S1 Sample information
Plot	Altitude（m）	Longitude（E)	Latitude（N）	Sample	Number
QSH	4 410	97°9′24″	33°49′59″	Root	QSH1-QSH20
				Rhizosphere soil	QSH1-QSH-20
ZQ	4 240	97°18′59″	33°23′34″	Root	ZQ1-ZQ20
				Rhizosphere soil	ZQ1-ZQ20
GD	3 960	99°41′5″	33°47′56″	Root	GD1-GD20
				Rhizosphere soil	GD1-GD20
MQ	3 900	100°21′5″	34°25′35″	Root	MQ1-MQ20
				Rhizosphere soil	MQ1-MQ20
ZK	3 690	101°28′1″	35°3′26″	Root	ZK1-ZK20
				Rhizosphere soil	ZK1-ZK20
XH	3 670	99°47′5″	35°50′16″	Root	XH1-XH20
				Rhizosphere soil	XH1-XH20
TJ	3 350	99°8′17″	37°13′40″	Root	TJ1-TJ20
				Rhizosphere soil	TJ1-TJ20
HY	3 200	100°48′13″	36°59′44″	Root	HY1-HY20
				Rhizosphere soil	HY1-HY20

## Sheet: Sheet2
Table S2 Tags information and OUT statistical analysis of sequencing in root and rhizosphere soil of K.humilis
Plot	Sample	Tags	Effective tags	Average length (bp)	Percentage of effective (%)	OTU number
QSH	Root	13282	12633	240	95.11	3203
	Rhizosphere soil	16552	14190	240	85.72	3863
ZQ	Root	8097	7727	242	95.43	2610
	Rhizosphere soil	23803	19746	240	82.95	3155
GD	Root	11878	10962	243	92.28	2117
	Rhizosphere soil	38383	36623	240	95.41	1674
MQ	Root	27455	25809	244	94	1736
	Rhizosphere soil	17940	14441	240	80.49	1982
ZK	Root	38266	32208	223	84.16	3113
	Rhizosphere soil	33870	28204	240	83.27	2115
XH	Root	27169	26262	237	96.66	2374
	Rhizosphere soil	30020	25091	240	83.58	3840
TJ	Root	43752	42036	235	96.07	1988
	Rhizosphere soil	26725	21639	240	80.96	3601
HY	Root	46516	43343	240	93.15	2282
	Rhizosphere soil	22157	19672	240	88.78	4871

## Sheet: Sheet3
Table S3 Eigenvector centrality in root of K. humilis
Id	modularity_class	Eccentricity	closnesscentrality	harmonicclosnesscentrality	betweenesscentrality	eigencentrality
ZK	1	3	0.648515	0.810433	1712.37	1
XH	0	3	0.635922	0.800254	1500.74	0.996761
ZQ	2	3	0.62381	0.790076	1825.07	0.962569
QSH	2	3	0.595455	0.764631	1005.9	0.969465
HY	0	3	0.59009	0.759542	1007.39	0.956258
GD	2	3	0.545833	0.71374	668.965	0.883176
TJ	2	3	0.53252	0.698473	382.225	0.888939
MQ	2	3	0.524	0.688295	646.341	0.843764
Nectriaceae	0	2	0.515748	0.530534	16.6352	0.317634
Psathyrellaceae	0	2	0.515748	0.530534	16.6352	0.317634
Tricholomataceae	1	2	0.515748	0.530534	16.6352	0.317634
Mortierellaceae	2	2	0.515748	0.530534	16.6352	0.317634
Hyaloscyphaceae	1	2	0.515748	0.530534	16.6352	0.317634
Auriculariaceae	0	2	0.515748	0.530534	16.6352	0.317634
Helotiaceae	0	2	0.515748	0.530534	16.6352	0.317634
Minutisphaeraceae	0	2	0.515748	0.530534	16.6352	0.317634
Diatrypaceae	0	2	0.515748	0.530534	16.6352	0.317634
Herpotrichiellaceae	0	2	0.515748	0.530534	16.6352	0.317634
Lentitheciaceae	0	2	0.515748	0.530534	16.6352	0.317634
Sebacinaceae	2	2	0.515748	0.530534	16.6352	0.317634
Hypocreaceae	0	2	0.515748	0.530534	16.6352	0.317634
Dermateaceae	0	2	0.515748	0.530534	16.6352	0.317634
Lasiosphaeriaceae	2	2	0.515748	0.530534	16.6352	0.317634
Sporormiaceae	0	2	0.515748	0.530534	16.6352	0.317634
Chaetomellaceae	2	2	0.515748	0.530534	16.6352	0.317634
Massarinaceae	1	2	0.515748	0.530534	16.6352	0.317634
Bolbitiaceae	0	2	0.515748	0.530534	16.6352	0.317634
Agaricaceae	0	2	0.515748	0.530534	16.6352	0.317634
Aspergillaceae	0	2	0.515748	0.530534	16.6352	0.317634
Melanommataceae	1	2	0.515748	0.530534	16.6352	0.317634
Pleurotheciaceae	0	2	0.515748	0.530534	16.6352	0.317634
Gymnoascaceae	1	2	0.515748	0.530534	16.6352	0.317634
Mycosphaerellaceae	1	2	0.515748	0.530534	16.6352	0.317634
Phaeosphaeriaceae	1	2	0.515748	0.530534	16.6352	0.317634
Phaeomoniellaceae	0	2	0.515748	0.530534	16.6352	0.317634
Filobasidiaceae	0	2	0.515748	0.530534	16.6352	0.317634
Cucurbitariaceae	2	2	0.515748	0.530534	16.6352	0.317634
Didymellaceae	2	2	0.515748	0.530534	16.6352	0.317634
Serendipitaceae	2	2	0.515748	0.530534	16.6352	0.317634
Bulleribasidiaceae	0	2	0.515748	0.530534	16.6352	0.317634
Microdochiaceae	2	2	0.515748	0.530534	16.6352	0.317634
Clavariaceae	2	2	0.515748	0.530534	16.6352	0.317634
Trichomeriaceae	1	2	0.515748	0.530534	16.6352	0.317634
Ceratobasidiaceae	0	2	0.515748	0.530534	16.6352	0.317634
Omphalotaceae	2	2	0.515748	0.530534	16.6352	0.317634
Coniochaetaceae	2	2	0.515748	0.530534	16.6352	0.317634
Olpidiaceae	2	2	0.515748	0.530534	16.6352	0.317634
Orbiliaceae	2	2	0.515748	0.530534	16.6352	0.317634
Gloniaceae	1	2	0.515748	0.530534	16.6352	0.317634
Microsporomycetaceae	2	2	0.515748	0.530534	16.6352	0.317634
Leptosphaeriaceae	1	2	0.515748	0.530534	16.6352	0.317634
Trichosporonaceae	0	2	0.515748	0.530534	16.6352	0.317634
Teratosphaeriaceae	2	2	0.515748	0.530534	16.6352	0.317634
Didymosphaeriaceae	1	2	0.515748	0.530534	16.6352	0.317634
Stachybotryaceae	0	2	0.515748	0.530534	16.6352	0.317634
Cystobasidiaceae	0	2	0.515748	0.530534	16.6352	0.317634
Plectosphaerellaceae	1	2	0.515748	0.530534	16.6352	0.317634
Wallemiaceae	2	2	0.515748	0.530534	16.6352	0.317634
Leotiaceae	2	2	0.515748	0.530534	16.6352	0.317634
Thelephoraceae	0	2	0.515748	0.530534	16.6352	0.317634
Magnaporthaceae	2	2	0.515748	0.530534	16.6352	0.317634
Chionosphaeraceae	1	2	0.515748	0.530534	16.6352	0.317634
Archaeorhizomycetaceae	1	2	0.515748	0.530534	16.6352	0.317634
Bionectriaceae	2	2	0.515748	0.530534	16.6352	0.317634
Pleosporaceae	0	3	0.511719	0.525445	15.3001	0.280334
Thelebolaceae	0	4	0.507752	0.523537	13.7413	0.28038
Pleomassariaceae	2	4	0.503846	0.521628	12.8758	0.282122
Ophiocordycipitaceae	1	4	0.5	0.516539	11.7071	0.244822
Phomatosporaceae	0	4	0.496212	0.514631	10.2982	0.244867
Boletaceae	1	4	0.496212	0.517812	11.6406	0.275222
Extremaceae	2	4	0.496212	0.514631	10.2982	0.244867
Stephanosporaceae	2	4	0.496212	0.514631	10.4112	0.239916
Peniophoraceae	0	4	0.492481	0.509542	9.27826	0.207568
Dictyosporiaceae	0	4	0.488806	0.507634	8.65183	0.203814
Trichocomaceae	0	4	0.488806	0.507634	8.63257	0.204358
Niessliaceae	1	4	0.481618	0.500636	6.55634	0.16656
Pezizaceae	0	4	0.481618	0.506997	8.11841	0.239475
Chaetomiaceae	2	4	0.481618	0.503817	8.54038	0.198862
Sclerotiniaceae	2	4	0.478102	0.50827	9.28655	0.276597
Sporidiobolaceae	2	4	0.471223	0.501272	7.14323	0.239343
Myrmecridiaceae	0	4	0.471223	0.498092	6.07385	0.202221
Mrakiaceae	2	4	0.471223	0.498092	6.32339	0.202455
Coriolaceae	0	4	0.461268	0.489186	4.70464	0.161712
Morchellaceae	0	4	0.458042	0.490458	4.5667	0.203831
Clavicipitaceae	0	4	0.458042	0.490458	4.5667	0.203831
Pluteaceae	0	4	0.458042	0.484097	3.34041	0.123913
Marasmiaceae	1	4	0.44863	0.478372	3.22824	0.124147
Stictidaceae	2	4	0.44863	0.478372	2.8899	0.120938
Pseudeurotiaceae	1	4	0.445578	0.476463	2.2496	0.126067
Trimorphomycetaceae	0	4	0.445578	0.476463	2.2496	0.126067
Cladosporiaceae	1	4	0.433775	0.46883	1.40134	0.122358
Lophiostomataceae	1	4	0.433775	0.465649	1.60631	0.083683
Pyronemataceae	1	4	0.433775	0.465649	1.60631	0.083683
Piskurozymaceae	1	4	0.430921	0.466921	1.54086	0.120365
Coniocybaceae	1	4	0.430921	0.46374	0.997895	0.085059
Sordariaceae	0	4	0.430921	0.46374	0.997895	0.085059
Erythrobasidiaceae	2	4	0.430921	0.470102	2.58772	0.156187
Exidiaceae	0	4	0.419872	0.459288	1.21003	0.120675
Erysiphaceae	0	4	0.414557	0.45229	0.611731	0.08311
Vibrisseaceae	1	4	0.414557	0.45229	0.611731	0.08311
Rhizophlyctidaceae	2	4	0.41195	0.450382	0.532973	0.079901
Microascaceae	0	4	0.406832	0.446565	0.460946	0.08342
Cantharellaceae	2	4	0.404321	0.444656	0.415734	0.079667
Bulleraceae	0	4	0.40184	0.442748	0.604116	0.077925
Aureobasidiaceae	2	4	0.40184	0.442748	0.866561	0.076549
Crepidotaceae	0	4	0.39697	0.438931	0.35042	0.081472
Cordycipitaceae	0	4	0.39697	0.438931	0.35042	0.081472
Myxotrichaceae	1	4	0.394578	0.433842	0	0.042646
Phaeotremellaceae	1	4	0.394578	0.433842	0	0.042646
Lycoperdaceae	1	4	0.394578	0.433842	0	0.042646
Neodevriesiaceae	1	4	0.394578	0.433842	0	0.042646
Clavulinaceae	1	4	0.394578	0.433842	0	0.042646
Corticiaceae	0	4	0.389881	0.430025	0	0.042412
Entolomataceae	0	4	0.389881	0.430025	0	0.042412
Ascodesmidaceae	0	4	0.389881	0.430025	0	0.042412
Glomerellaceae	0	4	0.389881	0.430025	0	0.042412
Diaporthaceae	2	4	0.385294	0.426209	0	0.041037
Inocybaceae	2	4	0.385294	0.426209	0	0.041037
Ganodermataceae	2	4	0.385294	0.426209	0	0.041037
Malasseziaceae	2	4	0.385294	0.426209	0	0.041037
Spizellomycetaceae	2	4	0.385294	0.426209	0	0.041037
Dothideaceae	2	4	0.385294	0.426209	0	0.041037
Cyphellophoraceae	2	4	0.385294	0.426209	0	0.041037
Verrucariaceae	2	4	0.385294	0.426209	0	0.041037
Cladoniaceae	2	4	0.385294	0.426209	0	0.041037
Physalacriaceae	2	4	0.374286	0.416667	0	0.041008
Powellomycetaceae	2	4	0.374286	0.416667	0	0.041008
Periconiaceae	0	4	0.372159	0.414758	0	0.040464
Nidulariaceae	0	4	0.372159	0.414758	0	0.040464
Schizoporaceae	2	4	0.354054	0.397583	0	0.037254
Hydnodontaceae	2	4	0.344737	0.388041	0	0.035512
Steccherinaceae	2	4	0.344737	0.388041	0	0.035512

## Sheet: Sheet4
Table S4 Eigenvector centrality in rhizosphere soil of K. humilis
Id	modularity_class	Eccentricity	closnesscentrality	harmonicclosnesscentrality	betweenesscentrality	eigencentrality
HY	1	3	0.686916	0.840136	2531.91	1
QSH	0	3	0.662162	0.821995	2251.6	0.981043
TJ	2	3	0.6125	0.781179	1555.49	0.944838
MQ	0	3	0.602459	0.772109	1617.87	0.923418
XH	2	3	0.592742	0.763039	1424.36	0.912338
ZQ	0	3	0.536496	0.704082	638.566	0.831117
Mortierellaceae	0	2	0.513986	0.527211	17.2432	0.286939
Mycosphaerellaceae	0	2	0.513986	0.527211	17.2432	0.286939
Nectriaceae	0	2	0.513986	0.527211	17.2432	0.286939
Gymnoascaceae	1	2	0.513986	0.527211	17.2432	0.286939
Sporormiaceae	2	2	0.513986	0.527211	17.2432	0.286939
Tricholomataceae	1	2	0.513986	0.527211	17.2432	0.286939
Phaeosphaeriaceae	1	2	0.513986	0.527211	17.2432	0.286939
Didymellaceae	2	2	0.513986	0.527211	17.2432	0.286939
Pyronemataceae	1	2	0.513986	0.527211	17.2432	0.286939
Chaetomellaceae	1	2	0.513986	0.527211	17.2432	0.286939
Hyaloscyphaceae	2	2	0.513986	0.527211	17.2432	0.286939
Pleosporaceae	2	2	0.513986	0.527211	17.2432	0.286939
Microdochiaceae	2	2	0.513986	0.527211	17.2432	0.286939
Sclerotiniaceae	2	2	0.513986	0.527211	17.2432	0.286939
Clavariaceae	2	2	0.513986	0.527211	17.2432	0.286939
Thelebolaceae	2	2	0.513986	0.527211	17.2432	0.286939
Herpotrichiellaceae	2	2	0.513986	0.527211	17.2432	0.286939
Leptosphaeriaceae	2	2	0.513986	0.527211	17.2432	0.286939
Aspergillaceae	0	2	0.513986	0.527211	17.2432	0.286939
Teratosphaeriaceae	0	2	0.513986	0.527211	17.2432	0.286939
Helotiaceae	0	2	0.513986	0.527211	17.2432	0.286939
Psathyrellaceae	1	2	0.513986	0.527211	17.2432	0.286939
Massarinaceae	2	2	0.513986	0.527211	17.2432	0.286939
Hyponectriaceae	0	2	0.513986	0.527211	17.2432	0.286939
Filobasidiaceae	2	2	0.513986	0.527211	17.2432	0.286939
Mrakiaceae	2	2	0.513986	0.527211	17.2432	0.286939
Didymosphaeriaceae	2	2	0.513986	0.527211	17.2432	0.286939
Sebacinaceae	0	2	0.513986	0.527211	17.2432	0.286939
Coriolaceae	2	2	0.513986	0.527211	17.2432	0.286939
Cladosporiaceae	0	2	0.513986	0.527211	17.2432	0.286939
Bulleribasidiaceae	1	2	0.513986	0.527211	17.2432	0.286939
Serendipitaceae	2	2	0.513986	0.527211	17.2432	0.286939
Strophariaceae	2	2	0.513986	0.527211	17.2432	0.286939
Orbiliaceae	2	2	0.513986	0.527211	17.2432	0.286939
Trimorphomycetaceae	1	2	0.513986	0.527211	17.2432	0.286939
Cucurbitariaceae	2	2	0.513986	0.527211	17.2432	0.286939
Ceratobasidiaceae	2	2	0.513986	0.527211	17.2432	0.286939
Pezizaceae	1	2	0.513986	0.527211	17.2432	0.286939
Schizoporaceae	2	2	0.513986	0.527211	17.2432	0.286939
Verrucariaceae	2	2	0.513986	0.527211	17.2432	0.286939
Sporidiobolaceae	2	2	0.513986	0.527211	17.2432	0.286939
Agaricaceae	2	2	0.513986	0.527211	17.2432	0.286939
Montagnulaceae	0	2	0.513986	0.527211	17.2432	0.286939
Hygrophoraceae	2	2	0.513986	0.527211	17.2432	0.286939
Trichomeriaceae	0	2	0.513986	0.527211	17.2432	0.286939
Chaetomiaceae	0	2	0.513986	0.527211	17.2432	0.286939
Thelephoraceae	0	2	0.513986	0.527211	17.2432	0.286939
Geoglossaceae	2	3	0.510417	0.522676	15.2983	0.25317
Bulleraceae	2	3	0.510417	0.522676	15.2983	0.25317
Bolbitiaceae	2	3	0.510417	0.522676	15.2983	0.25317
Morchellaceae	1	4	0.506897	0.520975	13.8349	0.260411
Auriculariaceae	1	4	0.506897	0.520975	13.8349	0.260411
Lentitheciaceae	2	4	0.506897	0.520975	13.8349	0.260411
Aureobasidiaceae	2	4	0.506897	0.520975	13.8349	0.260411
Entolomataceae	1	4	0.506897	0.520975	13.8349	0.260411
Spiculogloeaceae	1	4	0.506897	0.520975	14.4977	0.255582
Lasiosphaeriaceae	0	4	0.506897	0.520975	14.4977	0.255582
Hypocreaceae	0	4	0.506897	0.520975	13.8349	0.260411
Kondoaceae	1	4	0.506897	0.520975	13.8349	0.260411
Mucoraceae	0	4	0.506897	0.520975	13.8349	0.260411
Piskurozymaceae	2	4	0.506897	0.520975	13.8349	0.260411
ZK	2	3	0.506897	0.6678	566.38	0.774113
Dothideaceae	1	4	0.503425	0.51644	12.1654	0.226642
Omphalotaceae	1	4	0.503425	0.51644	12.7387	0.221813
Erysiphaceae	2	4	0.503425	0.51644	12.1654	0.226642
Corticiaceae	2	4	0.503425	0.51644	12.1654	0.226642
Phaeococcomycetaceae	2	4	0.503425	0.51644	12.1654	0.226642
Wallemiaceae	1	4	0.5	0.514739	11.3535	0.229053
Meruliaceae	0	4	0.5	0.514739	11.3535	0.229053
Exidiaceae	2	4	0.5	0.514739	11.3535	0.229053
Trichosporonaceae	0	4	0.5	0.514739	11.3535	0.229053
Archaeorhizomycetaceae	1	4	0.493289	0.514172	11.9232	0.249164
Steccherinaceae	2	4	0.493289	0.511338	9.76721	0.223126
Sordariaceae	0	4	0.493289	0.511338	10.3	0.218297
Extremaceae	0	4	0.486755	0.505102	8.36053	0.188009
Coniochaetaceae	0	4	0.486755	0.505102	7.64106	0.191769
Boletaceae	1	4	0.483553	0.503401	8.13247	0.184037
Olpidiaceae	1	4	0.483553	0.503401	8.13247	0.184037
Plectosphaerellaceae	0	4	0.483553	0.500567	6.42338	0.158
Sphaerobolaceae	1	4	0.483553	0.500567	6.42338	0.158
Minutisphaeraceae	0	4	0.483553	0.500567	6.42338	0.158
Tubeufiaceae	2	4	0.480392	0.498866	6.49045	0.156651
Ascodesmidaceae	2	4	0.480392	0.504535	8.61677	0.22005
Gloniaceae	0	4	0.480392	0.498866	6.49045	0.156651
Saccharomycodaceae	0	4	0.480392	0.501701	7.00631	0.191278
Pseudeurotiaceae	2	4	0.477273	0.502834	8.37692	0.219181
Cyphellophoraceae	1	4	0.474194	0.498299	6.63733	0.188693
Hydnodontaceae	0	4	0.468153	0.492063	4.72253	0.153136
GD	0	3	0.468153	0.613379	419.824	0.654204
Megasporaceae	0	4	0.46519	0.490363	4.21251	0.152645
Melanommataceae	1	4	0.462264	0.488662	3.96018	0.153993
Cordycipitaceae	0	4	0.462264	0.488662	4.40053	0.147648
Inocybaceae	0	4	0.462264	0.488662	3.96018	0.153993
Botryosphaeriaceae	0	4	0.459375	0.484127	3.08889	0.120224
Ambisporaceae	1	4	0.459375	0.484127	3.08889	0.120224
Peniophoraceae	0	4	0.459375	0.486961	3.91315	0.151408
Schizophyllaceae	1	4	0.453704	0.480726	2.97666	0.117639
Dothioraceae	2	4	0.453704	0.48356	3.48441	0.150048
Rhynchogastremataceae	0	4	0.45092	0.481859	3.75073	0.14919
Cystobasidiaceae	0	4	0.448171	0.477324	2.58445	0.108119
Protomycetaceae	0	4	0.445455	0.475624	1.88287	0.11536
Myrmecridiaceae	1	4	0.442771	0.471088	1.26712	0.081591
Erythrobasidiaceae	1	4	0.442771	0.471088	1.26712	0.081591
Lophiostomataceae	1	4	0.44012	0.472222	1.67593	0.112284
Capnodiaceae	2	4	0.434911	0.465986	1.07543	0.078515
Sympoventuriaceae	0	4	0.434911	0.468821	2.07197	0.109494
Marasmiaceae	2	4	0.432353	0.46712	1.9703	0.106392
Torulaceae	2	4	0.427326	0.460884	0.84478	0.079863
Geastraceae	0	4	0.427326	0.460884	0.988284	0.077646
Taphrinaceae	0	4	0.417614	0.456916	0.969056	0.105488
Teloschistaceae	2	4	0.412921	0.45068	0.716489	0.075918
Vibrisseaceae	1	4	0.408333	0.444444	0	0.04123
Rhizophlyctidaceae	1	4	0.408333	0.444444	0	0.04123
Trichocomaceae	1	4	0.408333	0.444444	0	0.04123
Microascaceae	1	4	0.408333	0.444444	0	0.04123
Physalacriaceae	1	4	0.408333	0.444444	0	0.04123
Pleurotaceae	1	4	0.408333	0.444444	0	0.04123
Ganodermataceae	1	4	0.408333	0.444444	0	0.04123
Cystofilobasidiaceae	1	4	0.408333	0.444444	0	0.04123
Ascobolaceae	0	4	0.406077	0.445578	0.666338	0.07506
Cantharellaceae	2	4	0.406077	0.445578	0.666338	0.07506
Physciaceae	0	4	0.399457	0.437642	0	0.040361
Diatrypaceae	0	4	0.399457	0.437642	0	0.040361
Clavulinaceae	0	4	0.399457	0.437642	0	0.040361
Niessliaceae	0	4	0.399457	0.437642	0	0.040361
Magnaporthaceae	0	4	0.399457	0.437642	0	0.040361
Hymenochaetaceae	0	4	0.399457	0.437642	0	0.040361
Dictyosporiaceae	0	4	0.399457	0.437642	0	0.040361
Neodevriesiaceae	2	4	0.380829	0.422336	0	0.038633
Polyporaceae	2	4	0.380829	0.422336	0	0.038633
Chionosphaeraceae	2	4	0.380829	0.422336	0	0.038633
Powellomycetaceae	2	4	0.380829	0.422336	0	0.038633
Amorosiaceae	0	4	0.376923	0.418934	0	0.037775
Ophiocordycipitaceae	0	4	0.376923	0.418934	0	0.037775
Glomerellaceae	0	4	0.376923	0.418934	0	0.037775
Myxotrichaceae	0	4	0.376923	0.418934	0	0.037775
Meripilaceae	0	4	0.376923	0.418934	0	0.037775
Pleurotheciaceae	2	4	0.373096	0.415533	0	0.037285
Leucosporidiaceae	2	4	0.373096	0.415533	0	0.037285
Halosphaeriaceae	2	4	0.373096	0.415533	0	0.037285
Coniothyriaceae	2	4	0.337156	0.379819	0	0.031358
Metschnikowiaceae	0	4	0.319565	0.35941	0	0.026528

## Sheet: Sheet5
Table S5 Environmental factor information
Sample_number	altitude	latitude	longitude	TN	TP	SOC	SMC	pH	Max T	AT	Min T	SD	DTR	Precipitation	ARH	WS
HY1	3200	36.99	100.8	11.44	2.62	130.88	18.0934	8.105	16.5	10	7.8	0.1	8.7	4.4	79	999998
HY2	3210	36.99	100.7	9.1	2.34	114.33	18.0285	8.058	21.1	12.1	5	9.4	16.1	0	71.5	999998
HY3	3200	36.98	100.8	10.76	2.34	129.89	18.1582	8.055	17.7	11.5	8.7	0.3	9	8.4	81	999998
HY4	3200	36.99	100.8	11.44	2.62	130.88	18.0934	8.105	16.5	10	7.8	0.1	8.7	4.4	79	999998
HY5	3210	36.99	100.7	9.1	2.34	114.33	18.0285	8.058	21.1	12.1	5	9.4	16.1	0	71.5	999998
HY6	3200	36.98	100.8	10.76	2.34	129.89	18.1582	8.055	17.7	11.5	8.7	0.3	9	8.4	81	999998
HY7	3200	36.98	100.8	10.76	2.34	129.89	18.1582	8.055	16.5	10	7.8	0.1	8.7	4.4	79	999998
HY8	3200	36.99	100.8	11.44	2.62	130.88	18.0934	8.105	16.5	10	7.8	0.1	8.7	4.4	79	999998
HY9	3210	36.99	100.7	9.1	2.34	114.33	18.0285	8.058	21.1	12.1	5	9.4	16.1	0	71.5	999998
HY10	3200	36.98	100.8	10.76	2.34	129.89	18.1582	8.055	17.7	11.5	8.7	0.3	9	8.4	81	999998
ZK1	3690	35.05	101.46	6.39	1.91	82.33	12.2326	7.498	13.8	10.6	8.2	0.7	5.6	9.5	81.8	999998
ZK2	3670	35.06	101.47	6.11	1.95	73.57	13.9706	7.507	19.6	11.4	4.1	10.5	15.5	15.6	75.8	999998
ZK3	3680	35.05	101.46	5.7	1.81	71.3	14.0374	7.519	14	6.5	3.3	4.2	10.7	2.3	85.3	999998
ZK4	3690	35.05	101.46	6.39	1.91	82.33	12.2326	7.498	13.8	10.6	8.2	0.7	5.6	9.5	81.8	999998
ZK5	3670	35.06	101.47	6.11	1.95	73.57	13.9706	7.507	19.6	11.4	4.1	10.5	15.5	15.6	75.8	999998
ZK6	3690	35.05	101.46	6.39	1.91	82.33	12.2326	7.498	14	6.5	3.3	4.2	10.7	2.3	85.3	999998
ZK7	3670	35.06	101.47	6.11	1.95	73.57	13.9706	7.507	13.8	10.6	8.2	0.7	5.6	9.5	81.8	999998
ZK8	3680	35.05	101.46	5.7	1.81	71.3	14.0374	7.519	19.6	11.4	4.1	10.5	15.5	15.6	75.8	999998
ZK9	3670	35.06	101.47	6.11	1.95	73.57	13.9706	7.507	14	6.5	3.3	4.2	10.7	2.3	85.3	999998
ZK10	3680	35.05	101.46	5.7	1.81	71.3	14.0374	7.519	14	6.5	3.3	4.2	10.7	2.3	85.3	999998
XH1	3680	37.22	99.13	4.33	1.62	44.19	12.6779	7.809	17.7	12.9	9.7	2.5	8	0	71.8	999998
XH2	3670	37.22	99.13	4.55	1.57	45.56	13.5188	7.881	20.6	12.4	5.7	2.9	14.9	8.2	80.3	999998
XH3	3660	37.23	101.14	4.34	1.63	46.21	13.7775	7.91	17.3	14	11.4	0.5	5.9	0	78.5	999998
XH4	3680	37.22	99.13	4.33	1.62	44.19	12.6779	7.809	17.7	12.9	9.7	2.5	8	0	71.8	999998
XH5	3670	37.22	99.13	4.55	1.57	45.56	13.5188	7.881	20.6	12.4	5.7	2.9	14.9	8.2	80.3	999998
XH6	3660	37.23	101.14	4.34	1.63	46.21	13.7775	7.91	17.3	14	11.4	0.5	5.9	0	78.5	999998
XH7	3680	37.22	99.13	4.33	1.62	44.19	12.6779	7.809	17.7	12.9	9.7	2.5	8	0	71.8	999998
XH8	3670	37.22	99.13	4.55	1.57	45.56	13.5188	7.881	20.6	12.4	5.7	2.9	14.9	8.2	80.3	999998
XH9	3660	37.23	101.14	4.34	1.63	46.21	13.7775	7.91	17.3	14	11.4	0.5	5.9	0	78.5	999998
XH10	3660	37.23	101.14	4.34	1.63	46.21	13.7775	7.91	17.3	14	11.4	0.5	5.9	0	78.5	999998
TJ1	3350	37.22	99.13	4.86	1.88	51.55	6.32069	8.467	18.5	10.8	4.9	5	13.6	0.5	67.5	999998
TJ2	3330	37.23	99.14	4.77	1.78	51.06	6.65336	8.486	19.6	12.3	5	12.8	14.6	0	57.8	999998
TJ3	3380	37.22	99.13	4.82	1.8	52.88	6.78643	8.437	16.9	10.8	5.5	1.5	11.4	0	74	999998
TJ4	3350	37.22	99.13	4.86	1.88	51.55	6.32069	8.467	18.5	10.8	4.9	5	13.6	0.5	67.5	999998
TJ5	3330	37.23	99.14	4.77	1.78	51.06	6.65336	8.486	19.6	12.3	5	12.8	14.6	0	57.8	999998
TJ6	3380	37.22	99.13	4.82	1.8	52.88	6.78643	8.437	16.9	10.8	5.5	1.5	11.4	0	74	999998
TJ7	3350	37.22	99.13	4.86	1.88	51.55	6.32069	8.467	18.5	10.8	4.9	5	13.6	0.5	67.5	999998
TJ8	3350	37.22	99.13	4.86	1.88	51.55	6.32069	8.467	18.5	10.8	4.9	5	13.6	0.5	67.5	999998
TJ9	3330	37.23	99.14	4.77	1.78	51.06	6.65336	8.486	19.6	12.3	5	12.8	14.6	0	57.8	999998
TJ10	3380	37.22	99.13	4.82	1.8	52.88	6.78643	8.437	16.9	10.8	5.5	1.5	11.4	0	74	999998
QSH1	4410	33.82	97.15	5.54	1.54	66.13	5.93407	7.714	17.6	6.9	-2.1	9.3	19.7	1.1	70.3	999998
QSH2	4430	33.83	97.16	4.91	1.63	62.08	6.22711	7.772	13.2	7.5	3.9	0.5	9.3	9.7	79.5	999998
QSH3	4420	34.83	97.14	5.36	1.57	68.77	6.37363	7.706	14	8.6	4.4	1.9	9.6	3.8	70.5	999998
QSH4	4410	33.82	97.15	5.54	1.54	66.13	5.93407	7.714	17.6	6.9	-2.1	9.3	19.7	1.1	70.3	999998
QSH5	4430	33.83	97.16	4.91	1.63	62.08	6.22711	7.772	13.2	7.5	3.9	0.5	9.3	9.7	79.5	999998
QSH6	4420	34.83	97.14	5.36	1.57	68.77	6.37363	7.706	14	8.6	4.4	1.9	9.6	3.8	70.5	999998
QSH7	4410	33.82	97.15	5.54	1.54	66.13	5.93407	7.714	17.6	6.9	-2.1	9.3	19.7	1.1	70.3	999998
QSH8	4410	33.82	97.15	5.54	1.54	66.13	5.93407	7.714	17.6	6.9	-2.1	9.3	19.7	1.1	70.3	999998
QSH9	4430	33.83	97.16	4.91	1.63	62.08	6.22711	7.772	13.2	7.5	3.9	0.5	9.3	9.7	79.5	999998
QSH10	4420	34.83	97.14	5.36	1.57	68.77	6.37363	7.706	14	8.6	4.4	1.9	9.6	3.8	70.5	999998
ZQ1	4250	33.392	97.32	10.26	2.49	141.31	20.6897	7.14	15.8	8	5.5	3.9	10.3	20.3	78.5	999998
ZQ2	4240	34.37	97.33	10.02	2.32	137.36	21.4334	7.205	10.3	4.8	0.3	0.1	10	4.7	84.5	999998
ZQ3	4220	35.38	97.31	9.43	2.32	110.05	21.3658	7.273	14	6.7	0.7	10.3	13.3	0	64.5	999998
ZQ4	4250	33.392	97.32	10.26	2.49	141.31	20.6897	7.14	15.8	8	5.5	3.9	10.3	20.3	78.5	999998
ZQ5	4250	33.392	97.32	10.26	2.49	141.31	20.6897	7.14	15.8	8	5.5	3.9	10.3	20.3	78.5	999998
ZQ6	4240	34.37	97.33	10.02	2.32	137.36	21.4334	7.205	10.3	4.8	0.3	0.1	10	4.7	84.5	999998
ZQ7	4220	35.38	97.31	9.43	2.32	110.05	21.3658	7.273	14	6.7	0.7	10.3	13.3	0	64.5	999998
ZQ8	4250	33.392	97.32	10.26	2.49	141.31	20.6897	7.14	15.8	8	5.5	3.9	10.3	20.3	78.5	999998
ZQ9	4240	34.37	97.33	10.02	2.32	137.36	21.4334	7.205	10.3	4.8	0.3	0.1	10	4.7	84.5	999998
ZQ10	4220	35.38	97.31	9.43	2.32	110.05	21.3658	7.273	14	6.7	0.7	10.3	13.3	0	64.5	999998
MQ1	3920	34.42	100.35	5.07	1.83	56.69	6.38436	7.339	16.9	10.8	8	2	8.9	4.6	82.5	999998
MQ2	3920	34.42	100.35	5.07	1.83	56.69	6.38436	7.339	16.9	10.8	8	2	8.9	4.6	82.5	999998
MQ3	3950	34.43	100.35	5.25	1.99	54.35	6.84039	7.491	14	9.4	7.6	0	6.4	16	85.8	999998
MQ4	3920	34.42	100.35	4.36	1.61	52.49	6.90554	7.617	18	10.5	4.9	9.3	13.1	0	67.3	999998
MQ5	3920	34.42	100.35	5.07	1.83	56.69	6.38436	7.339	16.9	10.8	8	2	8.9	4.6	82.5	999998
MQ6	3950	34.43	100.35	5.25	1.99	54.35	6.84039	7.491	14	9.4	7.6	0	6.4	16	85.8	999998
MQ7	3920	34.42	100.35	4.36	1.61	52.49	6.90554	7.617	18	10.5	4.9	9.3	13.1	0	67.3	999998
MQ8	3920	34.42	100.35	5.07	1.83	56.69	6.38436	7.339	16.9	10.8	8	2	8.9	4.6	82.5	999998
MQ9	3950	34.43	100.35	5.25	1.99	54.35	6.84039	7.491	14	9.4	7.6	0	6.4	16	85.8	999998
MQ10	3920	34.42	100.35	4.36	1.61	52.49	6.90554	7.617	18	10.5	4.9	9.3	13.1	0	67.3	999998
GD1	3960	33.79	99.68	5.06	2.04	60.12	18.2853	6.955	15.3	11.4	7.5	3.2	7.8	0.5	67.8	999998
GD2	3960	33.79	99.68	5.06	2.04	60.12	18.2853	6.955	15.3	11.4	7.5	3.2	7.8	0.5	67.8	999998
GD3	3950	33.79	99.68	4.72	2.01	51.97	19.0221	6.998	13.9	9.5	7.1	0.7	6.8	18.6	77.3	999998
GD4	3960	33.79	99.68	5.06	2.04	60.12	18.2853	6.955	15.3	11.4	7.5	3.2	7.8	0.5	67.8	999998
GD5	3950	33.79	99.68	4.72	2.01	51.97	19.0221	6.998	13.9	9.5	7.1	0.7	6.8	18.6	77.3	999998
GD6	3950	33.79	99.68	4.72	2.01	51.97	19.0221	6.998	13.9	9.5	7.1	0.7	6.8	18.6	77.3	999998
GD7	3960	33.79	99.68	5.06	2.04	60.12	18.2853	6.955	15.3	11.4	7.5	3.2	7.8	0.5	67.8	999998
GD8	3950	33.79	99.68	4.72	2.01	51.97	19.0221	6.998	13.9	9.5	7.1	0.7	6.8	18.6	77.3	999998
GD9	3950	33.79	99.68	4.72	2.01	51.97	19.0221	6.998	13.9	9.5	7.1	0.7	6.8	18.6	77.3	999998
GD10	3960	33.81	99.68	4.94	2.1	60.3	19.0891	7.133	16.6	9.3	3.6	3.4	13	0	68.3	999998
